# Supplementary material for: Genetic Variation Controlling Wrinkled Seed Phenotypes in Pisum: How Lucky Was Mendel?
Source: MDPI journal article supplement (doi:10.3390/ijms18061205), 2017-06-06
Supplement: s1 [file s1]

# Genetic Variation Controlling Wrinkled Seed Phenotypes in *Pisum*: How Lucky Was Mendel?

Tracey Rayner <sup>1,\*</sup>, Carol Moreau <sup>1 \*</sup>, Mike Ambrose <sup>1</sup>, Peter G. Isaac <sup>2</sup>, Noel Ellis <sup>3</sup> and Claire Domoney <sup>1 \*</sup>

AAATATAAATTCTAATATGATGCTACCATGATTTATGAAACTCAATCAACCTATCCTATAATCATTAAATGTTGTTTACAAATTTTGCAACAT  
GACAAATGACTTCCACATACATCCAAACCCCGCCATCAAATGTGAGATGTAAGCATCCTTAAATCATGAACAGTAATTTTGTGTACATAA  
GATAAACTACAAATACTTCCCTTTTAAACAACACTTTATTTTGTAGTGAAGTTCTAACACTTTGTTACATTTTACAACACATTGAAGCA  
AATAACACCCGCAAAAGTTACATCAAGTGAAAATGACATTTGTTGTGTAATGAGAATCCCATTACAACCTTGGACTTTTGTGAGTG  
AATCATTTTCATCAACCATGTTTCCAAAGGCAACAAATATCAAAAAATATAATAATATTTTGTAGAAATTGAGGTTTCTGAATTCTCTCA  
ATAAAGGCAACACTTTTCCCTTCATCACTACTCAATAATAGTTTGTAGATTACATTCTCTCTTTGTTTCTCTAGATTCTATATTTTAGTT  
GTGACCTTTCTACTAGCATTGTTTCTCTCTTATTCTCTTGGTCTGAGTTTGAACAACTCAAAAAAAGGCTTAGTTTGTGAGGTTACT  
ACAATTGCTTCTGGTTGTGTGAGCTTGAAAACCAACACCCATTTCCTAAATTTCAAAAAAGGTTCTTTTGTGGGAAAGAATCAAGGAAG  
CTTGAAAAACAGTTCATGGGTCACTACCCAGAAGAAGATCAAACTGCTTCTTTTCTGCTATTCTTACTTTCAGATGACCCCAAGGTTCC  
TGTAAACTCAGTTTCATTCTGGGTTTCACTTTTGTCTTCCAAATCTGAAAAAAGAAAGACTTTTCTCCCATTTATGACATAACT  
TTTTATGTTAATTATTTTGTCTACATTTTGTGTTGGTATATGATTATGATTATGATTATGATTATGATTATGATTATGATTATGATTATGATT  
CAAGTGCCCTTCATTTCTGAGACTAAGAGCTGATCCAAAAATGTGATTTCATTGTGTTGGGAGGAGGCGCTGGAACACATCTCTATCCTCT  
TACCAACGAGCTGCTGTGAGTGAGTGTGATGATGAATTGTTGTCTGAATCTAACATTTTGGTGTGTTGTGTAACCTTGTGCTGTTTGT  
GATGAAGATTGTTGTGCTGTGTTTGTGTTGAAAGCTTCTGTTGGAGGATGCTATAGGCTTATAGACATTCCAATGAGCACTGCATCAATAG  
TGGCATCAACAGATATTTGTGCTGACTCAGTTCAACTCTGCTTCACTAAATCGTCACATCGCTCGCACCTATTTTCGGAATGGTGTCACT  
TTTGGAGATGGATTGTTGGAGCTAATCATGCAATCACCATCATGAAAAATGGATGGAATTAGTACTTTTTTTTCTGCAATTTTATATGGA  
ACAATCTTTTAGCATACTTTGTTTATCTTTTGTGCGAATCCGAATAACTAGGATCCGCTCTTTTCTGGGATTTAGAGAGTTAAGAACAAAA  
AATATATTTTTCATGCAATGAGTTTGTGAGTGAACATGACAGTTGCCAACAAACAAAAACATAAGTAATTCGGTTTTCGCTAGAGAAATACCGAT  
CCAGTGAAGGAGATTCTGTTGATGAATTTCAAGTTTGTCTTATTTATGATTTCATGAGGACTAATTAAGTCAATCTAAATGTCAAAATAG  
GTTCTGGCGCGGACACAAACACCAGGAGAAGCTGGGAAGAAGTGGTTTCAAGGAACCTGCAGATGCTGTGAGACATTTACCTGGATATTGGA  
GCTAGACAAAGGATTTTGTGTTGTTGTATATACATTTTCGATAAAATAGATTCTTTTGTCTCATTTTGTAGCTTGTCAATAAGTAATA  
GATTGTTTGTGTTAGGATGCCAAGAATATAACGTGCGAAGTGTATTGATCTTGGCCGGAGATCATTTATATCGAATGGATTACATGGATCT  
ATTGCGATATATTTGTGAATGTTTGTAGAGTGGATTGTTTTCATTTTCATGTTCTAGAGTTTCTGATTTCATCTATATAACAAATTAACAG  
AGTCACGTTGATAGAAATGCCGATATTACAGTTTTCGTGTGCTGCGCTTGGTGACAAAGTGAATGAGTATTATACCTTTATTTCTAGAAATGGGTG  
AATAGAAAGAACTCAACTAAGTGGAACAAAAATACGATTTCATTTGTCTGATTTTCAGCCGCGCATCTGATTATGGATTGGTCAAAGTAGAC  
GACAGAGGCAACATCGTACAATTTTCAGAAAAACCGAAGGCGCTGATCTGAAAGCAATGTAAATTCCAAACATAATAACCTAATGTTTGCA  
CCTTCTTTCTGTTTCTTGTATCTGGTAAATCCACTGAGATTGTTTCATCTCTCATTTTTCAGCAAGTAGATACTTCTCGTCTTGGGTTGTCA  
CCGCAAGACGCATTGAAGTCCGCATATATTGCATCTATGGGAGTTTATGTGTTCAAGAAAGATGTTTACTCAAGCTTCTGAAATGGAGGTA  
TCCATCTTCTAATGACTTCGGATCCGAAATCATTTCTTCCGCAATAAGAGAGCACAATGTCCAAATAAGAGGAATTCGGATAAAATATATCAG  
CTTACAAATGTTTTTATCCATTTTCAGAAGATTTTATCTGCCATCTATGCTTTTATGCAAGCATATTTTTCGGAGACTACTGGGAAGATAT  
TGGAAACGATAAAATCCTTCTACGATGCTAACCTCGCTCTTACTGAAGAGGTAGGTTCAAGAATTTTTCAGTGTCTTGTTCAGTTTAGTTGA  
TTGAAACTAAAACTGTCTACATGTTACTCTCTCACAGAGTCCAAAGTTCGAGTTTATGATCCAAAACTCCGATTTTCACATCTCCAGGAT  
TCCACCAACCAAGAAATGACAACTCTCGGATACGATAATCTATCTATCTTGTATCATGCTAATAATTCGAAACATCATGTCTTTCTTAT  
TCTGTCCGCGTTGCTTTGTTGTTGGTAGGTTGTGGATGCCATTATCTCCCATGGATGTTTCTGAGAGATTGTACAATCCAACACTCCATTG  
TAGGTGAAAGGTCGCGTTTAGATTATGGCGTTGAGCTTCAGGTAATTAACCTACCATATATTCTAGACTCGTTACTCCATTAAACGGTTCTCT  
CCTAACGAAAAACAGATCAACTTTTACAGGACACTGTAATGATGGGAGCTGACTATTACCAAACTGAATCCGAAATCGCTTCCCTACTTGC  
AGAAGGGAAGGTCCTGATTCGGATCCGAAATGACAAATCAAATAAGAGGAGGAGGAGGAGGAGGAGGAGGAGGAGGAGGAGGAGGAGGAGG  
TGAAACTCATAGTTTGTATTTATTATCTCTGTAAAGGAACTGCATTATTGACAAGAATGCAAAAACTCGGGAAGAAGTTGTATCGCGA  
ACAAAGAAATAAGAAATAAAACAAGTTAGTAGTTTTCCTGTTCCAGCATACATTTGTTTACGCGTATAAACTCGAATGCTTTATCTGTAGGGCG  
TTCAAGAAGCAGATAGATCGGAAGATGGTTTCTACATCCGATCAGGAATCACCATCATAATGGAGAAAGCAACGATAGAAGACGGAAGTCTC  
ATAATAACAGATGATGTTTATTTTACGAGCTGTTTTCGTAAGCGCCGGAAGAAGCATTGCAAGGAACATCCCTCTATCTTTTGGG  
ATTGGTACAAATGTTATGTTGAATAGAGAAAGCTGCATGTGTAAATAGGAGAGCTCTTCTACTAGATGTAGAAATAGAAATGAATAAATG  
ATGAAAGTGAAGATGCAGAAAAGTTAAATAAATGGAAGGGT

Key:

**GCTGCG** borders the position of the nine base pair deletion relative to the wild-type gene

**INTRON**

**ATG**

**TAA** predicted by GeneMarker & database comparisons

Ps AGP1L-F1:GCAAGTGCCTTCATTTCTGAG  
Ps AGP1L-F2:TGGAGATGGATTTGTGGAGG  
Ps AGP1L-F3:GCAAGTAGATACTTCTCGTCTTGGG  
Ps AGP1L-F4:ACCGATTTTCACATCTCCTGG  
Ps AGP1L-F5:CCTCTTACCAAACGAGCTGC  
Ps Agp1l-F6:AGTTTCGTGTGCTGCGG  
Ps Agp1l-F7:GAGGTTACTACAATGGCTTCTGG  
Ps Agp1l-F8:TTTAGTTGTGACCTTTCACTACTAGC  
Ps Agp1l-F9:TTTCTCTCAATAAAGGCAACACC  
Ps Agp1l-F10:ACTTCCACATACATCCAAACCC

Ps Agp11-F11:GAATCCGAAATCGCTTCCC  
 Ps Agp11-F12:TGGCCGGAGATCATTTATATCG

Ps AGP1L-R1:CTCCTGGTGTGTTGAGTCGC  
 Ps AGP1L-R2:TGAACACATAAACTCCCATAGATGC  
 Ps AGP1L-R3:CTGAAGCTCAACGCCATAATC  
 Ps AGP1L-R4:TGATACCTTCACACACTCAACCC  
 Ps AGP1L-R5:GCATCCTCCAACAGGAACC  
 Ps Agp11-R6:ACATTGTGCTCTCTTATTGCGG  
 Ps Agp11-R7:GGATAGAGATGTGTTCCAGGC  
 Ps Agp11-R8:CGAAATAGGTGCGAGCG  
 Ps Agp11-R9:GGAACCTTTGGGGTCATCTG  
 Ps Agp11-R10:GCAGGTTTGATCTTCTTCTGGG  
 Ps Agp11-R11:CGATGACAACTTCTTTCCCG  
 Ps Agp11-R12:GCGAGGTTAGCATCGTAGAAGG

**Figure S1.** The consensus genomic sequence of the naturally occurring *rb* mutant allele for the large subunit of ADP-glucose pyrophosphorylase, present in the pea accession, JI 399. Introns are indicated in yellow highlight; forward and reverse primers are indicated in green and blue font, respectively, and underlined. The position where nine bases are missing relative to the wild-type allele is in pink font. Initiator and stop codons are highlighted in red. The sequences of 12 primer pairs are listed underneath the sequence.

#### A.

|           |                                                                  |     |
|-----------|------------------------------------------------------------------|-----|
| JI281Rfs1 | --PPSITKTATPQDVINTVDIGNSPLFSISLDQSRNFLVNGHPFLTQVPPNIITTTTSTP     | 58  |
| JI2110    | --PPSITKTATPQDVINTVDIGNSPLFSISLDQSRNFLVNGHPFLTQVPPNIITTTTSTP     | 58  |
| DB        | MAPPSITKTATQQDVISTVDIGNSPLLSISLDQSRNFLVNGHPFLTQVPPNIITTTTSTP     | 60  |
|           | ***** . ***** : *****                                            |     |
| JI281Rfs1 | SPFLDFKSNKDTIANNNNTLQQQGC FVG FNTTEAKSHHVPLGKLKGIKFTSIFRFKVWW    | 118 |
| JI2110    | SPFLDFKSNKDTIANNNNTLQQQGC FVG FNTTEAKSHHVPLGKLKGIKFTSIFRFKVWW    | 118 |
| DB        | SPFLDFKSNKDTIANNNNTLQQQGC FVG FNTTEAKSHHVPLGKLKGIKFTSIFRFKVWW    | 120 |
|           | *****                                                            |     |
| JI281Rfs1 | TTHWVG TNGHELQHETQILILDKNISLGRPYVLLLPILENSFR TSLQ PGLNDYVDM SVES | 178 |
| JI2110    | TTHWVG TNGHELQHETQILILDKNISLGRPYVLLLPILENSFR TSLQ PGLNDYVDM SVES | 178 |
| DB        | TTHWVG TNGHELQHETQILILDKNISLGRPYVLLLPILENSFR TSLQ PGLNDYVDM SVES | 180 |
|           | *****                                                            |     |
| JI281Rfs1 | GSTHVTGSTFKACLYLHLSNDPYRLVKEAVKVIQTQLGTFK TLEEKTPPSIIEKFGWCTW    | 238 |
| JI2110    | GSTHVTGSTFKACLYLHLSNDPYRLVKEAVKVIQTQLGTFK TLEEKTPPSIIEKFGWCTW    | 238 |
| DB        | GSTHVTGSTFKACLYLHLSNDPYRLVKEAVKVIQTQLGTFK TLEEKTPPSIIEKFGWCTW    | 240 |
|           | ***** . *****                                                    |     |
| JI281Rfs1 | DAFYLKVHPKGVREGVKALTDGGCPPGFVIIDDGWQSI SHDDDPVTERDGMNRTSAGEQ     | 298 |
| JI2110    | DAFYLKVHPKGVWEGVKALTDGGCPPGFVIIDDGWQSI SHDDDPVTERDGMNRTSAGEQ     | 298 |
| DB        | DAFYLKVHPKGVWEGVKALTDGGCPPGFVIIDDGWQSI SHDDDPVTERDGMNRTSAGEQ     | 300 |
|           | *****                                                            |     |
| JI281Rfs1 | MPCRLIKYEENYKFREYENGDNNGKKGLGVFRDLKEEF RSVESVYVWHALCGYWGGVRP     | 358 |
| JI2110    | MPCRLIKYEENYKFREYENGDNNGKKGLGVFRDLKEEF RSVESVYVWHALCGYWGGVRP     | 358 |
| DB        | MPCRLIKYEENYKFREYENGDNNGKKGLGVFRDLKEEF RSVESVYVWHALCGYWGGVRP     | 360 |
|           | *****                                                            |     |
| JI281Rfs1 | KVCGMPEAKVVVPKLSPGMKMTMEDLAVDKIVENG VGLVPPNLAQEMFDGIHSHLESAGI    | 418 |
| JI2110    | KVCGMPEAKVVVPKLSPGVKMTMEDLAVDKIVENG VGLVPPNLAQEMFDGIHSHLESAGI    | 418 |
| DB        | KVCGMPEAKVVVPKLSPGVKMTMEDLAVDKIVENG VGLVPPNLAQEMFDGIHSHLESAGI    | 420 |
|           | ***** . *****                                                    |     |
| JI281Rfs1 | DGVKVDVIHLLLELLSEEYGG RVELAKAYYKALTSSVNKHFKGNGVIASMEHCNDFLLGT    | 478 |
| JI2110    | DGVKVDVIHLLLELLSEEYGG RVELAKAYYKALTSSVNKHFKGNGVIASMEHCNDFLLGT    | 478 |
| DB        | DGVKVDVIHLLLELLSEEYGG RVELAKAYYKALTSSVNKHFKGNGVIASMEHCNDFLLGT    | 480 |
|           | *****                                                            |     |

|           |                                                                              |     |
|-----------|------------------------------------------------------------------------------|-----|
| JI281Rfs1 | EAISLGRVGDDFWCCDPSGDPNGTYWLQGCHMVHCAYNLSLWMGNFIHPDWDMFQSTHPCA                | 538 |
| JI2110    | EAISLGRVGDDFWCCDPSGDPNGTYWLQGCHMVHCAYNLSLWMGNFIHPDWDMFQSTHPCA                | 538 |
| DB        | EAISLGRVGDDFWCCDPSGDPNGTYWLQGCHMVHCAYNLSLWMGNFIHPDWDMFQSTHPCA<br>*****       | 540 |
| JI281Rfs1 | EFHAASRAISGGPVYVSDCVGNHNFKLLKSFVLPDGSILRCQHYALPTRDCLFEDPLHNG                 | 598 |
| JI2110    | EFHAASRAISGGPVYVSDCVGNHNFKLLKSFVLPDGSILRCQHYALPTRDCLFEDPLHNG                 | 598 |
| DB        | EFHAASRAISGGPVYVSDCVGNHNFKLLKSFVLPDGSILRCQHYALPTRDCLFEDPLHNG<br>*****        | 600 |
| JI281Rfs1 | KTMLKIWNLNKYAGVLGLFNCQGGGWCPEPTRRNKSASEFSRAVTCYASPEDIEWCNGKTP                | 658 |
| JI2110    | KTMLKIWNLNKYAGVLGLFNCQGGGWCPEPTRRNKSASEFSRAVTCYASPEDIEWCNGKTP                | 658 |
| DB        | KTMLKIWNLNKYAGVLGLFNCQGGGWCPEPTRRNKSASEFSRAVTCYASPEDIEWCNGKTP<br>*****:***** | 660 |
| JI281Rfs1 | MDIKGVDVFAVYFFKEKKLSLMKCSRLEVSLEPFSFELMTVSPLKVFSKRLIQFAPIGL                  | 718 |
| JI2110    | MDIKGVDVFAVYFFKEKKLSLMKCSRLEVSLEPFSFELMTVSPLKVFSKRLIQFAPIGL                  | 718 |
| DB        | MDIKGVDVFAVYFFKEKKLSLMKCSRLEVSLEPFSFELMTVSPLKVFSKRLIQFAPIGL<br>*****         | 720 |
| JI281Rfs1 | VNMLNSGGAVQSLEFDDASASLVKIGVRGCGELSVFMSEKPVCKIDGVSVEFDYEDKM--                 | 776 |
| JI2110    | VNMLNSGGAVQSLEFDDASASLVKIGVRGCGELSVFASEKPVCKIDGVSVEFDYEDKM--                 | 776 |
| DB        | VNMLNSGGAVQSLEFDDASASLVKIGVRGCGELSVFASEKPVCKIDGVSVEFDYEDKMVR<br>*****        | 780 |
| JI281Rfs1 | -----                                                                        | 776 |
| JI2110    | -----                                                                        | 776 |
| DB        | VQILWPGSSTLSLVEFLF                                                           | 798 |

**B.**

|            |                                                                             |     |
|------------|-----------------------------------------------------------------------------|-----|
| JI281AAP1  | MVVEKNASKNHHHQTDFDVSIDQQLDSKFFDDDGRVKRTGTSTASAHVITAVIGSGVLSL                | 60  |
| JI2110AAP1 | MVVEKNASKNHHHQTDFDVSIDQQLDSNFFDDDGRVKRTGTSTASAHVITAVIGSGVLSL                | 60  |
| AAX56951.1 | MVVEKNASKNHHHQTDFDVSIDQQLDSKFFDDDGRVKRTGTSTASAHVITAVIGSGVLSL<br>*****:***** | 60  |
| JI281AAP1  | AWAIAQLGWIAGPVVMILFAVWTTYTSVLLAECYRNGDPVNGKRNITYMEVHNSNLGGLQ                | 120 |
| JI2110AAP1 | AWAIAQLGWIAGPVVMILFAVWTTYTSVLLAECYRNGDPVNGKRNITYMEVHNSNLGGLQ                | 120 |
| AAX56951.1 | AWAIAQLGWIAGPVVMILFAVWTTYTSVLLAECYRNGDPVNGKRNITYMEVHNSNLGGLQ<br>*****       | 120 |
| JI281AAP1  | VQFCGFIQYLNLIQVAIGYTVASAISSMAIERSNICYHRSGGKDPCHMNSNAYMIAFGAVQ               | 180 |
| JI2110AAP1 | VQFCGFIQYLNLIQVAIGYTVASAISSMAIERSNICYHRSGGKDPCHMNSNAYMIAFGAVQ               | 180 |
| AAX56951.1 | VQFCGFIQYLNLIQVAIGYTVASAISSMAIERSNICYHRSGGKDPCHMNSNAYMIAFGAVQ<br>*****      | 180 |
| JI281AAP1  | IIVSQIPDFDQLWWSIVAAVMSFTYSTIGLGLGIGKVIENKKFAGTITGVNDVTKAQKT                 | 240 |
| JI2110AAP1 | IIVSQIPDFDQLWWSIVAAVMSFTYSTIGLGLGIGKVIENKKFAGTITGVNDVTKAQKT                 | 240 |
| AAX56951.1 | IIVSQIPDFDQLWWSIVAAVMSFTYSTIGLGLGIGKVMENKKFAGTITGVNDVTKAQKT<br>*****:*****  | 240 |
| JI281AAP1  | WGSLLQALGDIAFAYSFSMILIEIQDQTVKAPPPSESKTMMKATLISVIVTTFYMLCGCLG               | 300 |
| JI2110AAP1 | WGSLLQALGDIAFAYSFSMILIEIQDQTVKAPPPSESKTMMKATLISVIVTTFYMLCGCLG               | 300 |
| AAX56951.1 | WGSLLQALGDIAFAYSFSMILIEIQDQTVKAPPPSESKTMMKATLISVIVTTFYMLCGCLG<br>*****      | 300 |
| JI281AAP1  | YAAFGNSSPGNLLTGFGFYNPFWLLDIANAIAIVHLIGAYQVYCQPLYAFVENYMTKKFP                | 360 |
| JI2110AAP1 | YAAFGNSSPGNLLTGFGFYNPFWLLDIANAIAIVHLIGAYQVYCQPLYAFVENYMTKKFP                | 360 |
| AAX56951.1 | YAAFGNSSPGNLLTGFGFYNPFWLLDIANAIAIVHLIGAYQVYCQPLYAFVENYMTKKFP<br>*****.*:**  | 360 |
| JI281AAP1  | DNYFLNKNIKIPIPGLDYKLNLFKLVWRTVFVILTTLVSMLLPFFNDIVGLLGALGFWP                 | 420 |
| JI2110AAP1 | DNYFLNKNIKIPIPGLDYKLNLFKLVWRTVFVILTTLVSMLLPFFNDIVGLLGALGFWP                 | 420 |
| AAX56951.1 | DNYFLNKNIKIPIPGLDYKLNLFKLVWRTVFVILTTLVSMLLPFFNDIVGLLGALGFWP<br>*****        | 420 |

```

JI281AAP1   LTVYFPVEMYIIQKKIPKWSTKWICLQLLSGACLIITIAASVGSIAGIYLDLKVFKPFKT   480
JI2110AAP1  LTVYFPVEMYIIQKKIPKWSTKWTCLQLLSGACLIITIAASVGSIAGIYLDLKVFKPFKT   480
AAX56951.1  LTVYFPVEMYIIQKKIPKWSTKWTCLQLLSGACLIITIAASVGSIAGIYLDLKVFKPFKT   480
*****

JI281AAP1   IY   482
JI2110AAP1  IY   482
AAX56951.1  IY   482
**

```

**Figure S2.** The protein sequences predicted for genes (*Rfs*, *AAP1*) on LG III which map in the region of the testa trait in JI 2110 x JI 281. **A.** Rfs comparison in JI 2110, JI 281 and the NCBI database accession AJ426475 (DB). **B.** AAP1 comparison in JI 2110, JI 281 and the NCBI accession AAX56951. Asterisks or dots underneath the alignments indicate amino acid identity or extent of similarity, respectively.
